# Supplementary material for: Higher HIV-1 Env gp120-Specific Antibody-Dependent Cellular Cytotoxicity (ADCC) Activity Is Associated with Lower Levels of Defective HIV-1 Provirus
Source: MDPI journal article supplement (doi:10.3390/v15102055), 2023-10-06
Supplement: s1 [file s1]

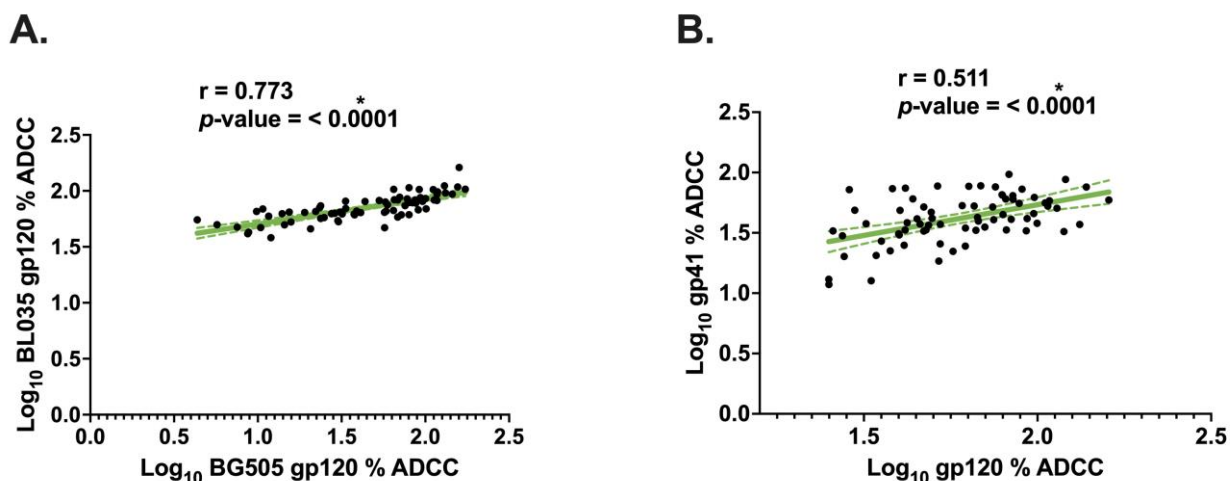

**Supplementary Figure S1. Correlations of ADCC Measures.** (A) Pearson correlation of  $\log_{10}$  ADCC activity measured using the Clade A BG505 gp120 antigen and the Clade A/D BL035 gp120 antigen; (B) Pearson correlation of  $\log_{10}$  gp120-specific ADCC activity and  $\log_{10}$  gp41-specific ADCC activity. \*denotes a  $p$ -value  $\leq 0.05$ .

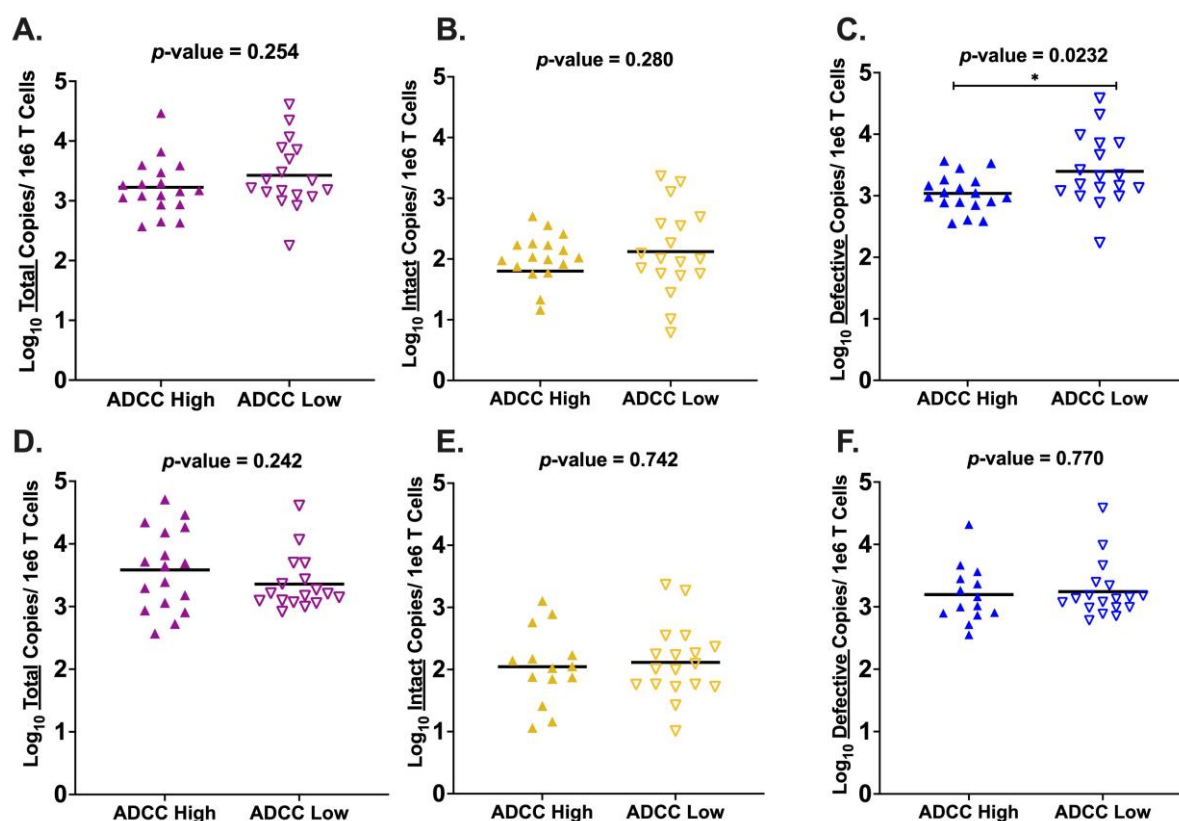

**Supplementary Figure S2. Comparing HIV Provirus Levels in ADCC High Versus Low Groups.** Unpaired t test of  $\log_{10}$  mean HIV proviral copies between “ADCC High” ( $n = 18$ ) and “ADCC Low” ( $n = 18$ ) groups. Participants with ADCC activity at, or above, the cohort 75th percentile were labeled “ADCC High” with those at, or below, the cohort 25th percentile labeled as “ADCC Low.” (A-C) Stratification based on gp120-specific ADCC activity. (A) Total HIV provirus; (B) Intact HIV provirus; (C) Defective HIV provirus; (D-F) Stratification based on gp41-specific ADCC activity. (D) Total HIV provirus; (E) Intact HIV provirus; (F) Defective HIV provirus. Different colors in the figures designate which proviral category is being analyzed: purple: total; yellow: intact; blue: defective. In all figures, the ADCC High group is denoted by filled in triangles pointing upward, with the ADCC Low group denoted by empty triangles pointing downward. \*denotes a  $p$ -value  $\leq 0.05$ .

**Supplementary Table S1. Linear Regression Models.**

| <b>Intact HIV Provirus</b>                                                |             |                         |                                 |          |                                               |         |                                              |          |
|---------------------------------------------------------------------------|-------------|-------------------------|---------------------------------|----------|-----------------------------------------------|---------|----------------------------------------------|----------|
|                                                                           | Mean (SD)   | 95% Confidence Interval | Univariate Coefficient (95% CI) | p-value  | Full Model Multivariable Coefficient (95% CI) | p-value | Backward Selected Model Coefficient (95% CI) | p-value  |
| Intact HIV Provirus (c/1e6 CD4 cells)                                     | 1.81 (1.03) | (1.55, 2.07)            |                                 |          |                                               |         |                                              |          |
| Age (Months) at Enrollment                                                | 64 (35)     | (50.55, 77.45)          | 0.0040 (-0.0037, 0.0113)        | 0.3266   |                                               |         |                                              |          |
| HIV RNA (log <sub>10</sub> c/mL)                                          | 5.84 (0.70) | (5.68, 6.00)            | -0.0680 (-0.4555, 0.3196)       | 0.7323   |                                               |         |                                              |          |
| % CD4                                                                     | 10 (11)     | (6.47, 13.54)           | -0.0019 (-0.0259, 0.0221)       | 0.8761   |                                               |         |                                              |          |
| CD4 Count (cells/mm <sup>3</sup> )                                        | 437 (459)   | (308.81, 565.19)        | -0.0004 (-0.0009, 0.0002)       | 0.2225   |                                               |         |                                              |          |
| Average % ADCC (gp120)                                                    | 1.79 (0.19) | (1.77, 1.81)            | -0.2012 (-1.5118, 1.1094)       | 0.7645   | 0.2354 (-1.3407, 1.8114)                      | 0.7660  | -0.0471 (-1.5270, 1.4328)*                   | 0.9490   |
| Average % ADCC (gp41)                                                     | 1.62 (0.20) | (1.60, 1.64)            | -0.2646 (-1.5404, 1.0112)       | 0.6857   | -0.1641 (-1.6060, 1.2779)                     | 0.8200  | -0.1873 (-1.5810, 1.2064)*                   | 0.7890   |
| *Model includes only exposure of interest and age at enrollment (months). |             |                         |                                 |          |                                               |         |                                              |          |
| **p-value <0.05                                                           |             |                         |                                 |          |                                               |         |                                              |          |
| <b>Total HIV Provirus</b>                                                 |             |                         |                                 |          |                                               |         |                                              |          |
|                                                                           | Mean (SD)   | 95% Confidence Interval | Univariate Coefficient (95% CI) | p-value  | Full Model Multivariable Coefficient (95% CI) | p-value | Backward Selected Model Coefficient (95% CI) | p-value  |
| Total HIV Provirus (c/1e6 CD4 cells)                                      | 3.35 (0.54) | (3.22, 3.48)            |                                 |          |                                               |         |                                              |          |
| Age (Months) at Enrollment                                                | 64 (35)     | (50.55, 77.45)          | 0.0021 (-0.0016, 0.0058)        | 0.2677   |                                               |         |                                              |          |
| HIV RNA (log <sub>10</sub> c/mL)                                          | 5.84 (0.70) | (5.68, 6.00)            | -0.1221 (-0.3087, 0.0645)       | 0.2050   |                                               |         |                                              |          |
| % CD4                                                                     | 10 (11)     | (6.47, 13.54)           | 0.0021 (-0.0100, 0.0142)        | 0.7391   |                                               |         |                                              |          |
| CD4 Count (cells/mm <sup>3</sup> )                                        | 437 (459)   | (308.81, 565.19)        | -3.3e-05 (-0.0003, 0.0003)      | 0.8190   |                                               |         |                                              |          |
| Average % ADCC (gp120)                                                    | 1.79 (0.19) | (1.77, 1.81)            | -0.6485 (-1.3103, -0.0134)      | 0.0589   | -0.6560 (-1.4260, 0.1139)                     | 0.0935  | -0.5137 (-1.2452, 0.2177)*                   | 0.1650   |
| Average % ADCC (gp41)                                                     | 1.62 (0.20) | (1.60, 1.64)            | 0.2995 (-0.3355, 0.9345)        | 0.3585   | 0.2278 (-0.4790, 0.9354)                      | 0.5221  | 0.3250 (-0.3474, 0.9975)*                    | 0.3380   |
| *Model includes only exposure of interest and age at enrollment (months). |             |                         |                                 |          |                                               |         |                                              |          |
| **p-value <0.05                                                           |             |                         |                                 |          |                                               |         |                                              |          |
| <b>Defective HIV Provirus</b>                                             |             |                         |                                 |          |                                               |         |                                              |          |
|                                                                           | Mean (SD)   | 95% Confidence Interval | Univariate Coefficient (95% CI) | p-value  | Full Model Multivariable Coefficient (95% CI) | p-value | Backward Selected Model Coefficient (95% CI) | p-value  |
| Defective HIV Provirus (c/1e6 CD4 cells)                                  | 3.18 (0.43) | (3.08, 3.28)            |                                 |          |                                               |         |                                              |          |
| Age (Months) at Enrollment                                                | 64 (35)     | (50.55, 77.45)          | 0.0018 (-0.0013, 0.0049)        | 0.2660   |                                               |         |                                              |          |
| HIV RNA (log <sub>10</sub> c/mL)                                          | 5.84 (0.70) | (5.68, 6.00)            | -0.0340 (-0.1922, 0.1243)       | 0.6755   |                                               |         |                                              |          |
| % CD4                                                                     | 10 (11)     | (6.47, 13.54)           | 0.0004 (-0.0094, 0.0103)        | 0.9288   |                                               |         |                                              |          |
| CD4 Count (cells/mm <sup>3</sup> )                                        | 437 (459)   | (308.81, 565.19)        | -9.1e-05 (-0.0003, 0.0001)      | 0.4501   |                                               |         |                                              |          |
| Average % ADCC (gp120)                                                    | 1.79 (0.19) | (1.77, 1.81)            | -0.6349 (-1.1570, -0.1129)      | 0.0202** | -0.0515 (-1.1430, 0.1129)                     | 0.106   | -0.5882 (-1.1526, -0.0239)*                  | 0.0414** |
| Average % ADCC (gp41)                                                     | 1.62 (0.20) | (1.60, 1.64)            | -0.2336 (-0.7614, 0.2942)       | 0.3890   | -0.2245 (-0.8100, 0.3611)                     | 0.4450  | -0.2146 (-0.7784, 0.3493)*                   | 0.4490   |
| *Model includes only exposure of interest and age at enrollment (months). |             |                         |                                 |          |                                               |         |                                              |          |
| **p-value <0.05                                                           |             |                         |                                 |          |                                               |         |                                              |          |

**Supplementary Table S2. Key Resources**

| Reagent or Resource                                                                                 | Source                                           | Identifier                    |
|-----------------------------------------------------------------------------------------------------|--------------------------------------------------|-------------------------------|
| Human Plasma or PBMC from PAD Cohort Participants                                                   | Wamalwa et al., JIAIDS 2009 [92]                 | N/A                           |
| Polyclonal Anti-Human Immunodeficiency Virus Immune Globulin, Pooled Inactivated Human Sera (HIVIG) | NIH AIDS Reagent Program                         | Catalog #3957                 |
| Human Negative Control Serum                                                                        | NIH AIDS Reagent Program                         | Catalog # 2411                |
| Human: CEM NKR                                                                                      | NIH AIDS Reagent Program                         | Catalog # 458; RRID:CVCL_X622 |
| BG505.W6M.ENV.B1 (BG505) gp120                                                                      | Cambridge Biologics, Brookline, MA, USA          | Cat#01-01-1028                |
| BL035.W6M.ENV.C1 (BG035) gp120                                                                      | Immune Technology Corporation, New York, NY, USA | Cat#IT-001-115p               |
| ZA.1197MB gp41                                                                                      | Immune Technology Corporation, New York, NY, USA | Cat# IT-001-0052p             |
| PKH26 Red Fluorescent Cell Linker Kit                                                               | Sigma Aldrich, Saint Louis, MO, USA              | Cat#MINI26-1KT                |
| CellVue Claret Far Red Cell Linker dye                                                              | Sigma Aldrich, Saint Louis, MO, USA              | Cat #MINCLARET-1KT            |
| Vybrant CFDA SE. Cell Tracer Kit                                                                    | Invitrogen, Waltham, MA, USA                     | Cat#V12883                    |
| FlowJo v9.9                                                                                         | TreeStar                                         | RRID: SCR_008520              |
| Excel v16.76                                                                                        | Microsoft                                        | RRID: SCR_016137              |
| Prism 9.5c                                                                                          | GraphPad                                         | RRID: SCR_002798              |
